# Supplementary material
Source: HighWire-hosted journal article supplement (https://ard.bmj.com/content/79/6/771)
Supplement: inline-supplementary-material-1 [file inline-supplementary-material-1.pdf]

## Supplement

Table S1. Search Strategy Using MEDLINE and EMBASE for Cost-of-illness Studies in Rheumatoid Arthritis

|    | Query                                                                                      | Results |
|----|--------------------------------------------------------------------------------------------|---------|
|    | Search filter for economic studies from Scottish Intercollegiate Guidelines Network (SIGN) |         |
| 1  | Economics.af.                                                                              | 999167  |
| 2  | "costs and cost analysis".af.                                                              | 50521   |
| 3  | Cost allocation.af.                                                                        | 2844    |
| 4  | Cost-benefit analysis.af.                                                                  | 175670  |
| 5  | Cost control.af.                                                                           | 92905   |
| 6  | Cost savings.af.                                                                           | 92926   |
| 7  | Cost of illness.af.                                                                        | 52485   |
| 8  | Cost sharing.af.                                                                           | 11976   |
| 9  | "deductibles and coinsurance".af.                                                          | 2107    |
| 10 | Medical savings accounts.af.                                                               | 1193    |
| 11 | Health care costs.af.                                                                      | 118202  |
| 12 | Direct service costs.af.                                                                   | 1239    |
| 13 | Drug costs.af.                                                                             | 35774   |
| 14 | Employer health costs.af.                                                                  | 1159    |
| 15 | Hospital costs.af.                                                                         | 48982   |
| 16 | Health expenditures.af.                                                                    | 27664   |
| 17 | Capital expenditures.af.                                                                   | 2918    |
| 18 | Value of life.af.                                                                          | 9518    |
| 19 | Exp economics, hospital.af.                                                                | 11293   |
| 20 | Exp economics, medical.af.                                                                 | 10963   |
| 21 | Economics, nursing.af.                                                                     | 4266    |
| 22 | Economics, pharmaceutical.af.                                                              | 3028    |
| 23 | Exp "fees and charges".af.                                                                 | 9333    |
| 24 | Exp budgets.af.                                                                            | 61612   |
| 25 | (low adj cost).af.                                                                         | 181669  |
| 26 | (high adj cost) .af.                                                                       | 80703   |
| 27 | (health?care adj cost\$).af.                                                               | 80964   |
| 28 | (fiscal or funding or financial or finance) .af..                                          | 2312342 |
| 29 | (cost adj estimate\$).af.                                                                  | 20117   |
| 30 | (cost adj variable) .af.                                                                   | 813     |
| 31 | (unit adj cost\$).af.                                                                      | 17841   |
| 32 | (economic\$ or pharmacoeconomic\$ or price\$ or pricing) .af.                              | 2520189 |
| 33 | Or/1-32                                                                                    | 4692540 |
| 33 | rheumatoid arthritis.sh.                                                                   | 189714  |
| 34 | 33 and 34                                                                                  | 7494    |
| 35 | limit 35 to yr="2000 - 2019"                                                               | 6867    |
| 36 | Not editorials                                                                             | 6655    |
| 37 | Not conference paper and abstract                                                          | 4537    |
| 38 | Not review                                                                                 | 3154    |
| 39 | Not letter                                                                                 | 3031    |

|    |             |         |
|----|-------------|---------|
|    | Query       | Results |
| 40 | Not animals | 2981    |

Table S2. CHEERS checklist—modified version for COI study\*

| Section/item                         | Item No | Recommendation                                                                                                                                                                                                                                                 | Modified Recommendation |
|--------------------------------------|---------|----------------------------------------------------------------------------------------------------------------------------------------------------------------------------------------------------------------------------------------------------------------|-------------------------|
| Title and abstract                   |         |                                                                                                                                                                                                                                                                |                         |
| Title                                | 1       | Identify the study as a COI study or use more specific terms such as direct costs, indirect costs (productivity loss), and economic burden.                                                                                                                    |                         |
| Abstract                             | 2       | Provide a structured summary of objectives, perspective, setting, methods (including study design and data source), results, and conclusions.                                                                                                                  |                         |
| Introduction                         |         |                                                                                                                                                                                                                                                                |                         |
| Background and objectives            | 3       | Provide an explicit statement of the broader context for the study.                                                                                                                                                                                            |                         |
|                                      |         | Present the study question and its relevance for health policy or practice decisions.                                                                                                                                                                          |                         |
| Methods                              |         |                                                                                                                                                                                                                                                                |                         |
| Target population and subgroups      | 4       | Describe characteristics of the population and subgroups analysed, including why they were chosen.                                                                                                                                                             |                         |
| Setting and location                 | 5       | State relevant aspects of the system(s) in which the decision(s) need(s) to be made.                                                                                                                                                                           |                         |
| Study perspective                    | 6       | Describe the perspective of the study and relate this to the costs being evaluated.                                                                                                                                                                            |                         |
| Population (optional)                | 7       | If the target population is compared with a matched population, describe the characteristics and how they have been matched.                                                                                                                                   |                         |
| Time horizon                         | 8       | State the time horizon(s) over which costs and consequences are being evaluated and say why appropriate.                                                                                                                                                       |                         |
| Cost components                      | 9       | Describe what cost components are taken into account and their relevance to the perspective of the study.                                                                                                                                                      |                         |
| Estimating resources and costs       | 10      | Describe primary or secondary research methods for valuing each resource item in terms of its unit cost. Describe any adjustments made to approximate to opportunity costs.                                                                                    |                         |
| Currency, price date, and conversion | 11      | Report the dates of the estimated resource quantities and unit costs. Describe methods for adjusting estimated unit costs to the year of reported costs if necessary. Describe methods for converting costs into a common currency base and the exchange rate. |                         |
| Choice of model (optional)           | 12      | If presented, describe and give reasons for the specific type of decision-analytical model used. Providing a figure to show model structure is strongly recommended.                                                                                           |                         |
| Assumptions (optional)               | 13      | If presented, describe all structural or other assumptions underpinning the decision-analytical model.                                                                                                                                                         |                         |
| Analytical methods                   | 14      | Describe all analytical methods supporting the COI study. This could include methods for dealing with skewed, missing, or censored data; extrapolation methods; methods for pooling data; and methods for handling population heterogeneity and uncertainty.   |                         |
| Results                              |         |                                                                                                                                                                                                                                                                |                         |
| Study parameters (optional)          | 15      | Report the values, ranges, references, and, if used, probability distributions for all parameters. Report reasons or sources for                                                                                                                               |                         |

| Section/item                                                         | Item No | Recommendation                                                                                                                                                                                                                                    | Modified Recommendation |
|----------------------------------------------------------------------|---------|---------------------------------------------------------------------------------------------------------------------------------------------------------------------------------------------------------------------------------------------------|-------------------------|
|                                                                      |         | distributions used to represent uncertainty where appropriate. Providing a table to show the input values is strongly recommended.                                                                                                                |                         |
| Cost                                                                 | 16      | Report mean values for the main categories of estimated costs, as well as mean difference between the matched groups if been compared.                                                                                                            |                         |
| Characterising uncertainty                                           | 17      | Describe the uncertainty of the estimated cost (such as confidence interval, standard deviation, and sensitivity analysis), together with the impact of methodological assumptions (such as discount rate, study perspective).                    |                         |
| Characterising heterogeneity                                         | 18      | If applicable, report differences in costs that can be explained by variations between subgroups of patients with different baseline characteristics or other observed variability in effects that are not reducible by more information.         |                         |
| Discussion                                                           |         |                                                                                                                                                                                                                                                   |                         |
| Study findings, limitations, generalisability, and current knowledge | 19      | Summarise key study findings and describe how they support the conclusions reached. Discuss limitations and the generalisability of the findings and how the findings fit with current knowledge.                                                 |                         |
| Other                                                                |         |                                                                                                                                                                                                                                                   |                         |
| Source of funding                                                    | 20      | Describe how the study was funded and the role of the funder in the identification, design, conduct, and reporting of the study. Describe other non-monetary sources of support.                                                                  |                         |
| Conflicts of interest                                                | 21      | Describe any potential for conflict of interest of study contributors in accordance with journal policy. In the absence of a journal policy, we recommend authors comply with International Committee of Medical Journal Editors recommendations. |                         |

\* The CHEERS checklist is designed to assess good reporting of economic evaluations, items regarding to choice of model, assumptions and parameters are kept as optional for few COI studies use model-based approach. Also, items specific to economic evaluation, such as comparator, outcome measurement, and effectiveness are replace by population (optional for studies with matched population), cost components, and cost.

Table S3. Characteristics of included studies, arranged by region, country, and year

| Study reference<br>(Author, Year,<br>Country) | Study population<br>(mean duration of<br>disease, gender, mean<br>age)                                     | Study design                                                                                                                          | Data source                                                                                                  |
|-----------------------------------------------|------------------------------------------------------------------------------------------------------------|---------------------------------------------------------------------------------------------------------------------------------------|--------------------------------------------------------------------------------------------------------------|
| <b>Europe</b>                                 |                                                                                                            |                                                                                                                                       |                                                                                                              |
| Radner 2014,<br>Austria <sup>1</sup>          | N=356<br>11.5 years, 79.8%<br>female, 59.9 years                                                           | Cross-sectional survey,<br>taking into account both<br>direct and indirect costs                                                      | RA clinic at a hospital                                                                                      |
| Westhovens<br>2005, Belgium <sup>2</sup>      | Early, n=48<br>0.5 years, 65% female,<br>59.2 years<br>Late, n=85<br>12.5 years, 79% female,<br>55.5 years | Cross-sectional survey on<br>early (< 1 year) and late RA<br>patients, taking into<br>account direct costs on<br>societal perspective | A multicentre<br>longitudinal study<br>from private<br>rheumatology<br>practices and<br>university hospitals |
| Klimes 2014,<br>Czech <sup>3</sup>            | N=261<br>14.5 years, 84.3%<br>female, 56.38 years                                                          | Cross-sectional survey,<br>taking into account both<br>direct and indirect costs on<br>societal perspective                           | At the centre for<br>treatment of<br>rheumatic diseases                                                      |
| Kruntoradova<br>2014, Czech <sup>4</sup>      | N=77<br>7.4 years, 64.9%<br>female, 45.3 years                                                             | Cross-sectional survey,<br>taking into account indirect<br>costs on societal<br>perspective                                           | Three specialised<br>centres for the<br>treatment of<br>rheumatic diseases                                   |
| Sogaard 2010,<br>Denmark <sup>5</sup>         | N=3,704<br>75% female, 60.6 years                                                                          | Cross-sectional survey<br>taking into account indirect<br>costs                                                                       | A cohort of patients<br>from 11 hospital-<br>based rheumatologic<br>clinics                                  |
| Kobelt 2008,<br>France <sup>6</sup>           | N=1,487<br>18 years, 83.5% female,<br>62.7 years                                                           | Cross-sectional survey,<br>taking into account both<br>direct and indirect costs on<br>payer's and societal<br>perspective            | Anonymous mail<br>survey from all<br>members of a<br>national patient<br>association (ANDAR)                 |
| Loppenthin<br>2017, Denmark <sup>7</sup>      | N=25,547<br>72.3% female, 24% 60-<br>69 years                                                              | Retrospective database<br>analysis, taking both direct<br>and indirect costs into<br>account on societal<br>perspective               | National Patient<br>Registry (NPR)                                                                           |
| Flipon 2009,<br>France <sup>8</sup>           | N=180, 71.1% female                                                                                        | Cross-sectional survey,<br>taking into account both<br>direct costs and indirect on<br>payer's perspective                            | Survey based on<br>patients in the French<br>Very Early rheumatoid<br>Arthritis (VErA) cohort                |

Table S3. Continued

| Study reference<br>(Author, Year,<br>Country) | Study population<br>(mean duration of<br>disease, gender, mean<br>age) | Study design                                                                                                                                                     | Data source                                                                                                                                  |
|-----------------------------------------------|------------------------------------------------------------------------|------------------------------------------------------------------------------------------------------------------------------------------------------------------|----------------------------------------------------------------------------------------------------------------------------------------------|
| Beresniak 2011,<br>France <sup>9</sup>        | NA                                                                     | Direct costs-modelling of RA<br>according to disease activity<br>categories on payer's<br>perspective                                                            | Resource utilization<br>and unit costs<br>estimated through<br>expert opinion and<br>simulated using<br>distribution ranges for<br>each item |
| Chevreur 2014,<br>France <sup>10</sup>        | N=813<br>214 days, 76.8%<br>female, 47.6 years                         | Retrospective database<br>analysis and survey data of<br>patients on distinct<br>DMARDs treatment, taking<br>into account direct costs on<br>payer's perspective | A multicentre,<br>prospective study of<br>patients with early<br>arthritis (ESPOIR<br>Cohort)                                                |
| Beck 2015,<br>France <sup>11</sup>            | N=862, 80.3% female                                                    | Retrospective database<br>analysis of patients on<br>biologic treatments, taking<br>into account direct costs on<br>payer's perspective                          | Administrative claims<br>data from the DCIR<br>and PMSI databases                                                                            |
| Fautrel 2016,<br>France <sup>12</sup>         | Not reported                                                           | Retrospective database<br>analysis, taking into account<br>direct costs on payer's<br>perspective                                                                | A national claim<br>database (EGB)                                                                                                           |
| Martikainen<br>2016, Finland <sup>13</sup>    | N=7,831<br>4 years (median), 71%<br>female, 46 years                   | Retrospective database<br>analysis, taking into account<br>indirect costs on societal<br>perspective                                                             | Health insurance<br>database                                                                                                                 |
| Ruof 2003,<br>Germany <sup>14</sup>           | N=338<br>8.4 years, 76% female,<br>58.4 years                          | Retrospective database<br>analysis, taking into account<br>both direct and indirect<br>costs on payer's perspective                                              | Health insurance<br>database (AKON) and<br>regional physicians'<br>association (KVN)                                                         |
| Hulsemann<br>2005,<br>Germany <sup>15</sup>   | N=136<br>77% female, 57.4 years                                        | Cross-sectional survey to<br>determine out-of-pocket<br>expenditures, taking into<br>account direct costs on<br>patients' perspective                            | A multicentre<br>randomised<br>controlled<br>prospective trial                                                                               |
| Merkesdal<br>2005,<br>Germany <sup>16</sup>   | N=234<br>8 years, 76% female, 53<br>years                              | Cost data derived from<br>questionnaires of patients<br>matched with payer's<br>database, taking into<br>account indirect costs on<br>societal perspective       | A multicentre<br>randomised<br>controlled<br>prospective trial<br>matched with a<br>health insurance<br>database (AKON)                      |

Table S3. Continued

| Study reference<br>(Author, Year,<br>Country)    | Study population<br>(mean duration of<br>disease, gender, mean<br>age)                                                              | Study design                                                                                                                                                               | Data source                                                                                                             |
|--------------------------------------------------|-------------------------------------------------------------------------------------------------------------------------------------|----------------------------------------------------------------------------------------------------------------------------------------------------------------------------|-------------------------------------------------------------------------------------------------------------------------|
| Kirchhoff<br>2011,<br>Germany <sup>17</sup>      | N=180<br>8.5 years, 69% female,<br>53 years                                                                                         | Cross-sectional survey,<br>taking into account both<br>direct and indirect costs<br>on societal perspective                                                                | A multi-centre<br>clinical trial on RA                                                                                  |
| Huscher 2015,<br>Germany <sup>18</sup>           | N=3,327<br>10.3 years, 75.8%<br>female, 63.1 years                                                                                  | Retrospective database<br>analysis, taking into<br>account both direct and<br>indirect costs on societal<br>perspective                                                    | The National<br>Database of the<br>Collaborative<br>Arthritis Centres<br>(NDB)                                          |
| Ziegelbauer<br>2018,<br>Germany <sup>19</sup>    | N=678<br>57.5% female<br>51.1 years                                                                                                 | Retrospective database<br>analysis of patients on<br>TNFi treatment, taking<br>direct costs into account                                                                   | German statutory<br>health insurance<br>funds database                                                                  |
| Horvath Cs<br>2014,<br>Hungary <sup>20</sup>     | N=976, 87% female                                                                                                                   | Retrospective database<br>analysis in long-term care<br>settings, taking into<br>account direct costs on<br>payer's perspective                                            | The National Health<br>Insurance Fund<br>Administration<br>(NHIFA)                                                      |
| Della Rossa<br>2010, Italy <sup>21</sup>         | N=34<br>14 years, 67.6%<br>female, 66.5 years                                                                                       | Cross-sectional survey,<br>taking into account both<br>direct and indirect costs<br>on societal perspective                                                                | RA patients in Pisa                                                                                                     |
| Verstappen<br>2007,<br>Netherlands <sup>22</sup> | <2/ 2-6/ 6-10/ >10<br>years,<br>n=73/ 214/ 114/ 60<br>0.9/ 4/ 7.7/ 19 years<br>77%/ 73%/ 62%/<br>78% female<br>54/ 58/ 61/ 60 years | Cross-sectional survey,<br>taking into account direct<br>costs on payer's<br>perspective.                                                                                  | A cross-sectional<br>study of the Utrecht<br>Rheumatoid Arthritis<br>Cohort study group<br>(SRU)                        |
| Kvamme 2012,<br>Norway <sup>23</sup>             | N=1,152<br>6 years, 72% female,<br>57 years                                                                                         | Retrospective database<br>analysis of patients on<br>DMARDs or biologic<br>treatments, taking into<br>account both direct and<br>indirect costs on societal<br>perspective | A Norwegian<br>DMARD register<br>(NOR-DMARD).<br>Patients were from<br>five rheumatology<br>departments in<br>hospitals |
| Malinowski<br>2016, Poland <sup>24</sup>         | N=8,800                                                                                                                             | Retrospective database<br>analysis, taking into<br>account indirect costs on<br>payer's perspective                                                                        | The Social Insurance<br>Institution database                                                                            |

Table S3. Continued

| Study reference<br>(Author, Year,<br>Country) | Study population<br>(mean duration of<br>disease, gender, mean<br>age)                                       | Study design                                                                                                                                                      | Data source                                                                                                                |
|-----------------------------------------------|--------------------------------------------------------------------------------------------------------------|-------------------------------------------------------------------------------------------------------------------------------------------------------------------|----------------------------------------------------------------------------------------------------------------------------|
| Miranda 2012,<br>Portugal <sup>25</sup>       | N=351<br>8.2 years, 84% female,<br>59 years                                                                  | Cross-sectional survey,<br>taking into account direct<br>costs on societal<br>perspective                                                                         | A cohort of RA<br>patients (FRAIL Study)                                                                                   |
| Leon 2016,<br>Spain <sup>26</sup>             | N=1,095, 74% female,<br>62 years                                                                             | Retrospective database<br>analysis, taking into account<br>direct costs on payer's<br>perspective                                                                 | A cohort of RA and<br>spondyloarthritis<br>patients (EMAR-II)<br>study                                                     |
| Jacobsson 2007,<br>Sweden <sup>27</sup>       | N=613<br>16.7 years (median),<br>73.9% female, 66 years                                                      | Cross-sectional survey,<br>taking into account both<br>direct and indirect costs on<br>societal perspective                                                       | RA patients living in<br>Malmo                                                                                             |
| Hallert 2014,<br>Sweden <sup>28</sup>         | N=125<br>6 years, 67% female, 55<br>years                                                                    | Cross-sectional survey on<br>patients after 6 years<br>follow-up of early RA, taking<br>into account both direct<br>and indirect costs on<br>societal perspective | A longitudinal<br>prospective<br>multicentre TIRA<br>study                                                                 |
| Eriksson 2015,<br>Sweden <sup>29</sup>        | Prevalent, n=49,829<br>9.7 years, 73% female,<br>65.1 years<br>Incident, n=2,695<br>69% female, 61.9 years   | Retrospective database<br>analysis, taking into account<br>both direct and indirect<br>costs on societal<br>perspective                                           | The Swedish National<br>Patient Register and<br>the Swedish<br>Rheumatology Quality<br>Register.                           |
| Johansson<br>2015, Sweden <sup>30</sup>       | Moderate, n=1,638<br>10 years, 74% female,<br>56 years<br>High, n=1,870<br>10 years, 75% female,<br>60 years | Retrospective database<br>analysis of patients grouped<br>into moderate and high<br>disease activity by DAS28,<br>taking into account direct<br>costs             | The Swedish<br>Rheumatology Quality<br>Register, primarily on<br>early arthritis and<br>patients on biologic<br>treatments |
| Hallert 2016,<br>Sweden <sup>31</sup>         | N=340<br>70.3% female, 59 years                                                                              | Cross-sectional survey on<br>early RA patients, taking<br>into account both direct<br>and indirect costs on<br>societal perspective                               | A longitudinal<br>prospective<br>multicentre study<br>(TIRA2)                                                              |



Table S3. Continued

| Study reference<br>(Author, Year,<br>Country) | Study population<br>(mean duration of<br>disease, gender, mean<br>age)                             | Study design                                                                                                                                                  | Data source                                                                                                                                                                                    |
|-----------------------------------------------|----------------------------------------------------------------------------------------------------|---------------------------------------------------------------------------------------------------------------------------------------------------------------|------------------------------------------------------------------------------------------------------------------------------------------------------------------------------------------------|
| Malhan 2010,<br>Turkey <sup>32</sup>          | N=562                                                                                              | Literature review of<br>patients on DMARDs or<br>TNFi treatment, taking into<br>account direct costs on<br>payer's perspective                                | Patient data taken<br>from a reference<br>article; cost data<br>collected from<br>hospital bills, social<br>security institution<br>price lists, and<br>Ministry of Health<br>drug price list. |
| Malhan<br>2012, Turkey <sup>33</sup>          |                                                                                                    | Expert opinions, taking into<br>account both direct and<br>indirect costs on societal<br>perspective                                                          | A panel of experts<br>chosen from 20 clinics<br>at tertiary healthcare<br>institutions<br>nationwide                                                                                           |
| Baser 2013,<br>Turkey <sup>34</sup>           | Prevalent, n=1,920<br>83.5% female, 53.9<br>years old<br>Incident, n=693<br>80% female, 52.1 years | Retrospective database<br>analysis of patients grouped<br>into prevalent and incident<br>cases, taking into account<br>direct costs on payer's<br>perspective | Turkish national<br>health insurance<br>database (MEDULA)                                                                                                                                      |
| <b>North America</b>                          |                                                                                                    |                                                                                                                                                               |                                                                                                                                                                                                |
| Fautrel 2007,<br>Canada <sup>35</sup>         | N=121<br>79.3% female, 63%<br>between 40-64 years                                                  | Cross-sectional survey on<br>patients and general<br>population, taking into<br>account both direct and<br>indirect costs on societal<br>perspective          | Patients recruited<br>from their treating<br>physicians; general<br>population enrolled<br>from random digit<br>dialling for people<br>living in Quebec                                        |
| Barnabe 2013,<br>Canada <sup>36</sup>         | N=1,086<br>13.6 years, 72.1%<br>female, 55.1 years                                                 | Retrospective database<br>analysis of patients on<br>biologic treatments, taking<br>into account direct costs on<br>societal perspective                      | The Alberta Biologics<br>Pharmacovigilance<br>Program (ABioPharm)<br>linked with provincial<br>health care<br>administrative<br>database                                                       |
| Tarride 2013,<br>Canada <sup>37</sup>         | N=233<br>75.5% female, 58.9<br>years                                                               | Cross-sectional survey on<br>patients linked<br>retrospective database<br>analysis, taking into account<br>direct costs                                       | Canadian Community<br>Health Survey (CCHS)<br>linked to the Ontario<br>Health Insurance<br>Program (OHIP)                                                                                      |

Table S3. Continued

| Study reference<br>(Author, Year,<br>Country) | Study population<br>(mean duration of<br>disease, gender, mean<br>age)                                                                                            | Study design                                                                                                                                                 | Data source                                                                                                                                                |
|-----------------------------------------------|-------------------------------------------------------------------------------------------------------------------------------------------------------------------|--------------------------------------------------------------------------------------------------------------------------------------------------------------|------------------------------------------------------------------------------------------------------------------------------------------------------------|
| Thanh 2013,<br>Canada <sup>38</sup>           | N=1,222<br>13 years, 69% female,<br>52 years                                                                                                                      | Retrospective database<br>analysis of patients on<br>DMARDs or TNFi treatment,<br>taking into account indirect<br>costs on societal<br>perspective           | The Alberta Biologics<br>Registry                                                                                                                          |
| Ohinmaa 2014,<br>Canada <sup>39</sup>         | N=1,086<br>13.6 years, 72.1%<br>female, 55.1 years                                                                                                                | Retrospective database<br>analysis of patients on<br>biologic treatments, taking<br>into account direct costs on<br>societal perspective                     | The Alberta Biologics<br>Pharmacosurveillance<br>Program (ABioPharm)<br>linked with provincial<br>health care<br>administrative<br>database                |
| Yelin 2007,<br>USA <sup>40</sup>              | N=4,801                                                                                                                                                           | Retrospective database<br>analysis, taking into account<br>direct costs                                                                                      | A national probability<br>sample of households<br>(MEPS)                                                                                                   |
| Kessler 2008,<br>USA <sup>41</sup>            | N=333<br>72.4% female, 52.9%<br>45–59 years                                                                                                                       | Cross-sectional survey,<br>taking into account direct<br>costs on employer's<br>perspective                                                                  | Samples from<br>manufacturing firm<br>(MF) employees and<br>commercially insured<br>subscribers                                                            |
| Joyce 2009,<br>USA <sup>42</sup>              | RA/+CVD/+depression/<br>+both above<br>n=8,916/608/716/58<br>77%/55%/88%/81%<br>female,<br>50.9/58.7/49.6/53<br>years                                             | Retrospective database<br>analysis of RA patients with<br>co-morbidities, taking into<br>account direct costs on<br>payer's perspective                      | The PharMetrics<br>Patient-Centric<br>Database                                                                                                             |
| Birnbaum 2010,<br>USA <sup>43</sup>           | Privately insured/<br>Medicare/ Medicaid<br>n=14,317/ 12,157/<br>6,415<br>33.3/ 42.9/ 38.5<br>months,<br>70.4%/ 70.6%/ 76.6%<br>female,<br>49.8/ 70.7/ 45.3 years | Retrospective database<br>analysis, taking into account<br>both direct and indirect<br>costs on societal, employer,<br>patients' and payer's<br>perspectives | Indirect costs from<br>Ingenix Employer<br>Database; direct costs<br>from the Medicare 5%<br>Standard Analytic and<br>Florida Medicaid<br>claims databases |

Table S3. Continued

| Study reference<br>(Author, Year,<br>Country) | Study population<br>(mean duration of<br>disease, gender, mean<br>age) | Study design                                                                                                                                                  | Data source                                                                                                                                                                |
|-----------------------------------------------|------------------------------------------------------------------------|---------------------------------------------------------------------------------------------------------------------------------------------------------------|----------------------------------------------------------------------------------------------------------------------------------------------------------------------------|
| Bonafede 2012,<br>USA <sup>44</sup>           | N=26,911<br>71.7% female, 59.7<br>years                                | Retrospective database<br>analysis, taking into account<br>direct costs on societal<br>perspective                                                            | The MarketScan<br>Commercial Claims<br>and Encounters<br>(Commercial)<br>Database and the<br>Medicare<br>Supplemental and<br>Coordination of<br>Benefits (COB)<br>Database |
| Kawatkar 2012,<br>USA <sup>45</sup>           | N=5.8 million<br>61.1% female, 19.3%<br>45–54 years                    | Retrospective database<br>analysis, taking into account<br>direct costs on payer's<br>perspective                                                             | A national probability<br>sample of households<br>(MEPS)                                                                                                                   |
| Simons 2012,<br>USA <sup>46</sup>             | N=34,145<br>80.4% female, 50.6%<br>40–64 years                         | Retrospective database<br>analysis, taking into account<br>both direct and indirect<br>costs                                                                  | A national probability<br>sample of households<br>(MEPS)                                                                                                                   |
| Kleinman 2013,<br>USA <sup>47</sup>           | N=2,705<br>61.4% female, 45.1<br>years                                 | Retrospective database<br>analysis, taking into account<br>both direct and indirect<br>costs on employer's<br>perspective                                     | US employees'<br>administrative health<br>care and payroll data<br>in an employer-<br>sponsored health<br>insurance plan                                                   |
| Gunnarsson<br>2015, USA <sup>48</sup>         | N=90,046<br>76.3% female, 38.8%<br>45–54 years                         | Retrospective database<br>analysis, taking into account<br>indirect costs                                                                                     | A national probability<br>sample of households<br>(MEPS)                                                                                                                   |
| Zhou 2016,<br>USA <sup>49</sup>               | Switched to another<br>TNFi, N=1,169<br>81.3% female, 49.3<br>years    | Retrospective database<br>analysis of patients on<br>different strategies of TNFi<br>treatment, taking into<br>account direct costs                           | A US employer-based<br>insurance claims<br>database.                                                                                                                       |
| Curtis 2017,<br>USA <sup>50</sup>             | N=4,593<br>11.8 years, 74.4%<br>female, 70.6 years                     | Retrospective database<br>analysis, taking into account<br>direct costs                                                                                       | A disease registry<br>across 40 states<br>(Corrona) linked to<br>administrative data<br>from Medicare                                                                      |
| Grabner 2017,<br>USA <sup>51</sup>            | TNFi treatment<br>responders, n=2,337<br>70.8% female, 52.3<br>years   | Retrospective database<br>analysis of patients on<br>different strategies of TNFi<br>treatment, taking into<br>account direct costs on<br>payer's perspective | Members of 14 large<br>U.S. commercial<br>health plans<br>represented in the<br>HealthCore Integrated<br>Research Database                                                 |

Table S3. Continued

| Study reference<br>(Author, Year,<br>Country) | Study population<br>(mean duration of<br>disease, gender, mean<br>age) | Study design                                                                                                                                       | Data source                                                                                        |
|-----------------------------------------------|------------------------------------------------------------------------|----------------------------------------------------------------------------------------------------------------------------------------------------|----------------------------------------------------------------------------------------------------|
| Chen 2018,<br>USA <sup>52</sup>               | N= 115,867<br>79.4% female, 75.2<br>years                              | Retrospective database<br>analysis, taking into account<br>direct costs                                                                            | Medicare fee-for-<br>service (FFS) claims<br>database                                              |
| Strand 2018,<br>USA <sup>53</sup>             | N= 2527<br>71.1% female, 56.9<br>years                                 | Retrospective database<br>analysis of patients on<br>biologic treatments, taking<br>both direct and indirect<br>costs into account                 | OptumHealth<br>Care Solutions<br>database                                                          |
| Asia                                          |                                                                        |                                                                                                                                                    |                                                                                                    |
| Aggarwal 2006,<br>India <sup>54</sup>         | N=101<br>8.1 years, 89% female,<br>43.2 years                          | Cross-sectional survey,<br>taking into account direct<br>costs                                                                                     | RA clinic at a tertiary<br>care hospital                                                           |
| Xu 2014,<br>China <sup>55</sup>               | N=829<br>9.2 years, 78.6%<br>female, 53.3 years                        | Cross-sectional survey,<br>taking into account both<br>direct and indirect costs on<br>societal perspective                                        | RA clinics at 21<br>tertiary care hospitals                                                        |
| Hu 2018,<br>China <sup>56</sup>               | N=133<br>68% female, 60.4 years                                        | Cross-sectional survey,<br>taking into account both<br>direct and indirect costs on<br>societal perspective                                        | RA clinics at 2 referral<br>hospitals                                                              |
| Lee 2007, Hong<br>Kong <sup>57</sup>          | N=147<br>12.6 years, 76.9%<br>female, 54.7 years                       | Retrospective database<br>analysis, taking into account<br>direct costs on payer's<br>perspective                                                  | RA clinic at a general<br>hospital                                                                 |
| Zhu 2011, Hong<br>Kong <sup>58</sup>          | N=144<br>10.8 years, 73% female,<br>49 years                           | Cross-sectional survey<br>linked to retrospective<br>database, taking into<br>account both direct and<br>indirect costs on societal<br>perspective | RA clinic at a general<br>hospital                                                                 |
| Tanaka 2010,<br>Japan <sup>59</sup>           | N=6,823<br>11.4 years, 83.3%<br>female, 58.4 years                     | Retrospective database<br>analysis, taking into account<br>direct costs on societal<br>perspective                                                 | A disease registry<br>database (IORRA)<br>from RA clinic at<br>Tokyo Women's<br>Medical University |
| Tanaka 2013,<br>Japan <sup>60</sup>           | N=5,265<br>12.9 years, 83.9%<br>female, 59.5 years                     | Cross-sectional survey<br>linked to retrospective<br>database analysis, taking<br>into account direct costs on<br>societal perspective             | A disease registry<br>database (IORRA)<br>from RA clinic at<br>Tokyo Women's<br>Medical University |

Table S3. Continued

| Study reference<br>(Author, Year,<br>Country) | Study population<br>(mean duration of<br>disease, gender, mean<br>age)                       | Study design                                                                                                                           | Data source                                                                                                                         |
|-----------------------------------------------|----------------------------------------------------------------------------------------------|----------------------------------------------------------------------------------------------------------------------------------------|-------------------------------------------------------------------------------------------------------------------------------------|
| Sruamsiri 2018,<br>Japan <sup>61</sup>        | N=250<br>9.8 years, 59% female,<br>52.1 years                                                | Cross-sectional survey,<br>taking into account indirect<br>costs                                                                       | A nationwide online<br>survey of RA patients                                                                                        |
| Sruamsiri 2018,<br>Japan <sup>61</sup>        | N= 6,153<br>77% female, 59.2 years                                                           | Retrospective database<br>analysis, taking into account<br>direct costs                                                                | Hospital claims data<br>from Medical Data<br>Vision Co., Ltd. (MDV)                                                                 |
| Kwon 2012,<br>South Korea <sup>62</sup>       | N=151,472<br>77.2% female, 53.1<br>years                                                     | Retrospective database<br>analysis, taking into account<br>direct costs on societal<br>perspective                                     | The national claims<br>database                                                                                                     |
| Lang 2016,<br>Taiwan <sup>63</sup>            | Prevalent, n=30,013<br>Female: male ratio 3.8<br>Incident, n=2,714<br>Female: male ratio 3.1 | Retrospective database<br>analysis, taking into account<br>direct costs                                                                | The National Health<br>Insurance Research<br>Database (NHIRD)                                                                       |
| Wang 2016,<br>Taiwan <sup>64</sup>            | N=41,269<br>78.1% female, 59.4<br>years                                                      | Retrospective database<br>analysis for direct costs and<br>a cross-sectional survey for<br>indirect costs                              | The National Health<br>Insurance Research<br>Database (NHIRD) and<br>140 patients<br>identified at RA clinics<br>in four hospitals. |
| Shi 2018,<br>Taiwan <sup>65</sup>             | N=110, 645<br>84% female, 55.5 years                                                         | Retrospective database<br>analysis, taking into account<br>direct costs                                                                | The National Health<br>Insurance Research<br>Database (NHIRD)                                                                       |
| Osiri 2007,<br>Thailand <sup>66</sup>         | N=158<br>10.3 years, 95.6%<br>female, 53.2 years                                             | Cross-sectional survey,<br>taking into account both<br>direct and indirect costs on<br>societal perspective                            | RA clinic in a major<br>tertiary care facility                                                                                      |
| Osiri 2013,<br>Thailand <sup>67</sup>         | N=684<br>6.3 years (DMARDs<br>treatment), 90.8%<br>female, 55.2 years                        | Retrospective database<br>analysis of patients on<br>DMARDs treatment, taking<br>into account direct costs on<br>societal perspective  | RA clinic in a major<br>tertiary care facility                                                                                      |
| <b>Latin America &amp; Australasia</b>        |                                                                                              |                                                                                                                                        |                                                                                                                                     |
| Chermont 2008,<br>Brazil <sup>68</sup>        | N=100<br>11 years, 92% female,<br>51 years                                                   | Cross-sectional survey<br>linked to retrospective<br>database analysis, taking<br>into account direct costs on<br>societal perspective | RA clinic in a tertiary<br>reference centre.                                                                                        |

Table S3. Continued

| Study reference<br>(Author, Year,<br>Country)       | Study population<br>(mean duration of<br>disease, gender, mean<br>age) | Study design                                                                                                 | Data source                                                                                                               |
|-----------------------------------------------------|------------------------------------------------------------------------|--------------------------------------------------------------------------------------------------------------|---------------------------------------------------------------------------------------------------------------------------|
| De Azevedo<br>2008, Brazil <sup>69</sup>            | N=192<br>9.79 years, 85.9%<br>female, 47.37 years                      | Cross-sectional survey,<br>taking into account indirect<br>costs on societal<br>perspective                  | RA clinic in a tertiary<br>reference centre.                                                                              |
| Alvarez-<br>Hernandez<br>2012, Mexico <sup>70</sup> | N=320<br>17 months, 89.3%<br>female, 42.7 years                        | Cross-sectional survey,<br>taking into account both<br>direct and indirect costs on<br>patients' perspective | 11 institutional and<br>private centres in five<br>major cities                                                           |
| Cross 2006,<br>Australia <sup>71</sup>              | N=70<br>25.9 years, 84.3%<br>female, 62.7 years                        | Cross-sectional survey,<br>taking into account direct<br>costs                                               | The Arthritis Cost and<br>Outcome Project,<br>patients were<br>recruited from public<br>and private<br>outpatient clinics |

Abbreviations: RA, rheumatoid arthritis; DAS28, Disease Activity Score-28; WPAI, Work Productivity and Activity Impairment questionnaire; WTP, willingness to pay; DMARDs, disease modified anti-rheumatic drugs; TNFi, tumour necrosis inhibitor; CVD, cardiovascular disease; USA, United States of America.

Table S4. Cost components of direct costs measured among included studies

| Author                  | Country     | Cost year | Drug cost | Inpatient <sup>a</sup> | Outpatient <sup>b</sup> | Diagnostic examination <sup>c</sup> | Devices and adaptation | Non-medical <sup>d</sup> |
|-------------------------|-------------|-----------|-----------|------------------------|-------------------------|-------------------------------------|------------------------|--------------------------|
| <b>Europe</b>           |             |           |           |                        |                         |                                     |                        |                          |
| Radner et al. 2014      | Austria     | NR        | +         | +                      | +                       | +                                   | +                      | +                        |
| Westhovens et al. 2005  | Belgium     | 2000      | +         | +                      | +                       |                                     | +                      | +                        |
| Klimes et al. 2014      | Czech       | 2013      | +         | +                      | +                       | +                                   |                        |                          |
| Loppenthin et al. 2018  | Denmark     | 2006      | +         | +                      | +                       |                                     |                        |                          |
| Flipon et al. 2009      | France      | 2003      | +         | +                      | +                       | +                                   |                        | +                        |
| Kobelt et al. 2008      | France      | 2005      | +         | +                      | +                       | +                                   | +                      | +                        |
| Chevreul et al. 2014    | France      | 2007      | +         | +                      | +                       | +                                   |                        | +                        |
| Beresniak et al. 2011   | France      | 2008      |           | +                      | +                       | +                                   | +                      | +                        |
| Fautrel et al. 2016     | France      | 2010      | +         | +                      | +                       | +                                   | +                      | +                        |
| Beck et al. 2015        | France      | 2012      | +         | +                      | +                       | +                                   |                        | +                        |
| Ruof et al. 2003        | Germany     | 2001      | +         | +                      | +                       | +                                   | +                      | +                        |
| Kirchhoff et al. 2011   | Germany     | 2002      | +         | +                      | +                       |                                     |                        | +                        |
| Hulsemann et al. 2005   | Germany     | 2004      | +         | +                      | +                       |                                     | +                      | +                        |
| Huscher et al. 2015     | Germany     | 2011      | +         | +                      | +                       | +                                   |                        |                          |
| Ziegelbauer et al. 2018 | Germany     | NR        | +         | +                      | +                       |                                     |                        |                          |
| Horvath Cs et al. 2014  | Hungary     | 2012      |           | +                      | +                       |                                     |                        |                          |
| Della Rossa et al. 2010 | Italy       | NR        | +         |                        | +                       | +                                   |                        | +                        |
| Verstappen et al. 2007  | Netherlands | 2003      | +         | +                      | +                       | +                                   | +                      | +                        |
| Kvamme et al. 2012      | Norway      | 2010      | +         | +                      | +                       | +                                   |                        |                          |
| Miranda et al. 2012     | Portugal    | 2010      | +         | +                      | +                       | +                                   | +                      | +                        |
| Leon et al. 2016        | Spain       | 2010      | +         | +                      | +                       | +                                   |                        | +                        |
| Jacobsson et al. 2007   | Sweden      | 2004      | +         | +                      | +                       |                                     | +                      | +                        |
| Eriksson et al. 2015    | Sweden      | 2010      | +         | +                      | +                       |                                     |                        |                          |
| Hallert et al. 2014     | Sweden      | 2012      | +         | +                      | +                       | +                                   |                        |                          |
| Johansson et al. 2015   | Sweden      | 2012      | +         | +                      | +                       |                                     |                        |                          |

Table S4. Cost components of direct costs measured among included studies

| Author                         | Country | Cost year | Drug cost | Inpatient <sup>a</sup> | Outpatient <sup>b</sup> | Diagnostic examination <sup>c</sup> | Devices and adaptation | Non-medical <sup>d</sup> |
|--------------------------------|---------|-----------|-----------|------------------------|-------------------------|-------------------------------------|------------------------|--------------------------|
| Hallert et al. 2016            | Sweden  | 2013      | +         | +                      | +                       | +                                   |                        |                          |
| Malhan et al. 2010             | Turkey  | NR        | +         | +                      | +                       | +                                   | +                      |                          |
| Malhan et al. 2012             | Turkey  | 2011      | +         | +                      | +                       |                                     |                        |                          |
| Baser et al. 2013              | Turkey  | NR        | +         | +                      | +                       | +                                   | +                      | +                        |
| <b>North America</b>           |         |           |           |                        |                         |                                     |                        |                          |
| Fautrel et al. 2007            | Canada  | 2002      | +         | +                      | +                       | +                                   | +                      |                          |
| Tarride et al. 2013            | Canada  | 2002      |           | +                      | +                       | +                                   |                        |                          |
| Barnabe et al. 2013            | Canada  | 2008      |           | +                      | +                       |                                     |                        |                          |
| Ohinmaa et al. 2014            | Canada  | 2008      |           | +                      | +                       |                                     |                        |                          |
| Yelin et al. 2007              | USA     | 2003      | +         | +                      | +                       |                                     | +                      | +                        |
| Kessler et al. 2008            | USA     | 2005      | +         | +                      | +                       |                                     |                        |                          |
| Birnbaum et al. 2010           | USA     | 2005      | +         | +                      | +                       |                                     | +                      | +                        |
| Joyce et al. 2009              | USA     | 2006      | +         | +                      | +                       | +                                   |                        |                          |
| Kawatkar et al. 2012           | USA     | 2008      | +         | +                      | +                       |                                     |                        | +                        |
| Bonafede et al. 2012           | USA     | NR        | +         | +                      | +                       |                                     |                        | +                        |
| Simons et al. 2012             | USA     | NR        | +         | +                      | +                       |                                     | +                      | +                        |
| Kleinman et al. 2013           | USA     | 2010      | +         | +                      | +                       |                                     |                        |                          |
| Chen et al. 2018               | USA     | 2013      | +         | +                      | +                       |                                     |                        |                          |
| Zhou et al. 2016 <sup>49</sup> | USA     | 2012      | +         | +                      | +                       |                                     |                        |                          |
| Grabner et al. 2017            | USA     | 2014      | +         | +                      | +                       | +                                   |                        |                          |
| Strand et al. 2018             | USA     | 2014      | +         | +                      | +                       | +                                   |                        | +                        |
| Curtis et al. 2017             | USA     | 2016      | +         | +                      | +                       |                                     |                        |                          |
| <b>Asia</b>                    |         |           |           |                        |                         |                                     |                        |                          |
| Aggarwal et al. 2006           | India   | NR        | +         | +                      |                         | +                                   |                        | +                        |
| Xu et al. 2014                 | China   | 2005      | +         | +                      | +                       | +                                   |                        | +                        |
| Hu et al. 2017                 | China   | 2013      | +         | +                      | +                       |                                     |                        |                          |



Table S4. Cost components of direct costs measured among included studies

| Author                        | Country     | Cost year | Drug cost | Inpatient <sup>a</sup> | Outpatient <sup>b</sup> | Diagnostic examination <sup>c</sup> | Devices and adaptation | Non-medical <sup>d</sup> |
|-------------------------------|-------------|-----------|-----------|------------------------|-------------------------|-------------------------------------|------------------------|--------------------------|
| Lee et al. 2007               | Hong Kong   | 2003      | +         | +                      | +                       | +                                   |                        |                          |
| Zhu et al. 2011               | Hong Kong   | 2006      | +         | +                      | +                       | +                                   | +                      | +                        |
| Tanaka et al. 2010            | Japan       | 2007      | +         |                        | +                       | +                                   | +                      |                          |
| Tanaka et al. 2013            | Japan       | 2007      | +         | +                      | +                       |                                     | +                      | +                        |
| Sruamsiri et al. 2018         | Japan       | 2016      | +         | +                      | +                       |                                     |                        |                          |
| Kwon et al. 2012              | South Korea | 2009      | +         | +                      | +                       | +                                   |                        |                          |
| Lang et al. 2016              | Taiwan      | 2011      | +         | +                      | +                       |                                     |                        |                          |
| Wang et al. 2016              | Taiwan      | 2011      | +         | +                      |                         | +                                   | +                      |                          |
| Shi et al. 2018               | Taiwan      | 2016      | +         | +                      | +                       |                                     |                        |                          |
| Osiri et al. 2007             | Thailand    | 2001      | +         | +                      | +                       | +                                   | +                      | +                        |
| Osiri et al. 2013             | Thailand    | 2009      | +         |                        | +                       | +                                   |                        |                          |
| <b>Latin America</b>          |             |           |           |                        |                         |                                     |                        |                          |
| Chermont et al. 2008          | Brazil      | 2002      | +         | +                      | +                       | +                                   | +                      | +                        |
| Alvarez-Hernandez et al. 2012 | Mexico      | 2005      | +         | +                      | +                       | +                                   | +                      | +                        |
| <b>Australasia</b>            |             |           |           |                        |                         |                                     |                        |                          |
| Cross et al. 2006             | Australia   | NR        | +         | +                      | +                       | +                                   | +                      |                          |

<sup>a</sup> Inpatient costs include costs of hospitalisation, surgery, and emergency room visit.

<sup>b</sup> Outpatient costs include costs of visits to physicians and other healthcare professionals, such as nurse, OT, PT etc.

<sup>c</sup> Diagnostic examination includes costs of imaging and laboratory tests.

<sup>d</sup> Non-medical costs include costs of informal care, home help, and transportation etc.

Table S5. Cost components of indirect costs measured among included studies

| Author                   | Country  | Cost year | Method  | Absenteeism <sup>a</sup> | Work disability <sup>b</sup> | Others                               |
|--------------------------|----------|-----------|---------|--------------------------|------------------------------|--------------------------------------|
| <b>Europe</b>            |          |           |         |                          |                              |                                      |
| Radner et al. 2014       | Austria  | NR        | HCA/FCA | +                        | +                            |                                      |
| Kruntoradova et al. 2014 | Czech    | 2010      | FCA     | +                        | +                            | Productivity impairment              |
| Klimes et al. 2014       | Czech    | 2013      | FCA     | +                        | +                            |                                      |
| Loppenthin et al. 2018   | Denmark  | 2006      | NR      | +                        | +                            | Foregone earnings                    |
| Sogaard et al. 2010      | Denmark  | 2007      | HCA     | +                        |                              | Presenteeism                         |
| Martikainen et al. 2016  | Finland  | 2013      | HCA     | +                        | +                            |                                      |
| Flipon et al. 2009       | France   | 2003      | NR      |                          | +                            |                                      |
| Kobelt et al. 2008       | France   | 2005      | HCA     | +                        | +                            |                                      |
| Merkesdal et al. 2005    | Germany  | 2001      | HCA/FCA | +                        | +                            |                                      |
| Kirchhoff et al. 2011    | Germany  | 2002      | HCA/FCA | +                        | +                            | Work loss                            |
| Ruof et al. 2003         | Germany  | 2003      | NR      | +                        | +                            |                                      |
| Huscher et al. 2015      | Germany  | 2011      | HCA/FCA | +                        | +                            |                                      |
| Della Rossa et al. 2010  | Italy    | NR        | HCA     | +                        |                              |                                      |
| Kvamme et al. 2012       | Norway   | 2010      | HCA/FCA | +                        |                              |                                      |
| Malinowski et al. 2016   | Poland   | 2012      | HCA     | +                        | +                            |                                      |
| Miranda et al. 2012      | Portugal | 2010      | HCA     | +                        |                              | Work day lost by the companion       |
| Jacobsson et al. 2007    | Sweden   | 2004      | NR      | +                        | +                            | Loss of leisure time                 |
| Eriksson et al. 2015     | Sweden   | 2010      | HCA/FCA | +                        | +                            |                                      |
| Hallert et al. 2014      | Sweden   | 2012      | HCA     | +                        | +                            |                                      |
| Hallert et al. 2016      | Sweden   | 2013      | HCA     | +                        | +                            |                                      |
| Malhan et al. 2012       | Turkey   | 2011      | HCA     | +                        | +                            |                                      |
| <b>North America</b>     |          |           |         |                          |                              |                                      |
| Fautrel et al. 2007      | Canada   | 2002      | HCA/WTP |                          |                              |                                      |
| Thanh et al. 2013        | Canada   | 2010      | HCA     | +                        |                              |                                      |
| Birnbaum et al. 2010     | USA      | 2005      | NR      | +                        | +                            |                                      |
| Simons et al. 2012       | USA      | NR        | NR      | +                        |                              | Workforce participation/ income loss |
| Gunnarsson et al. 2015   | USA      | 2008      | NR      | +                        |                              |                                      |

Table S5. Cost components of indirect costs measured among included studies

| Author                        | Country   | Cost year | Method | Absenteeism <sup>a</sup> | Work disability <sup>b</sup> | Others                                                         |
|-------------------------------|-----------|-----------|--------|--------------------------|------------------------------|----------------------------------------------------------------|
| Kleinman et al. 2013          | USA       | 2010      | NR     | +                        | +                            |                                                                |
| Strand et al. 2018            | USA       | 2014      | HCA    | +                        |                              |                                                                |
| <b>Asia</b>                   |           |           |        |                          |                              |                                                                |
| Xu et al. 2014                | China     | 2005      | HCA    | +                        |                              |                                                                |
| Hu et al. 2017                | China     | 2013      | HCA    | +                        |                              |                                                                |
| Zhu et al. 2011               | Hong Kong | 2006      | HCA    | +                        |                              | Unemployment/ days off from household work or daily activities |
| Sruamsiri et al. 2017         | Japan     | 2016      | NR     | +                        |                              | Presenteeism                                                   |
| Wang et al. 2016              | Taiwan    | 2011      | NR     | +                        |                              | Presenteeism                                                   |
| Osiri et al. 2007             | Thailand  | 2001      | NR     | +                        |                              |                                                                |
| <b>Latin America</b>          |           |           |        |                          |                              |                                                                |
| De Azevedo et al. 2008        | Brazil    | 2005      | HCA    | +                        |                              |                                                                |
| Alvarez-Hernandez et al. 2012 | Mexico    | 2005      | NR     |                          |                              | Job loss/ third party help                                     |

Abbreviations: HCA, human capital approach; FCA, friction cost approach; WTP, willingness to pay.

<sup>a</sup> Absenteeism includes the costs of work hour loss, short-term and long-term sick leaves.

<sup>b</sup> Work disability includes the costs of early retirement and disability pensions.

Table S6. Quality assessment by modified CHEERS checklist

| Recommendations                                                          | Yes | No | Not applicable | %    |
|--------------------------------------------------------------------------|-----|----|----------------|------|
| 1. Title                                                                 | 67  | 5  | 0              | 93%  |
| 2. Abstract                                                              | 59  | 13 | 0              | 82%  |
| 3. Background and objectives                                             | 69  | 3  | 0              | 96%  |
| 4. Target population and subgroups                                       | 62  | 9  | 0              | 87%  |
| 5. Setting and location                                                  | 71  | 1  | 0              | 99%  |
| 6. Study perspective                                                     | 50  | 22 | 0              | 59%  |
| 7. Population                                                            | 12  | 0  | 60             | 17%  |
| 8. Time horizon                                                          | 67  | 5  | 0              | 93%  |
| 9. Cost components                                                       | 61  | 11 | 0              | 85%  |
| 10. Estimating resources and costs                                       | 70  | 2  | 0              | 97%  |
| 11. Currency, price date, and conversion                                 | 63  | 9  | 0              | 88%  |
| 12. Choice of model                                                      | 1   | 0  | 71             | 1%   |
| 13. Assumptions                                                          | 1   | 0  | 71             | 1%   |
| 14. Analytical methods                                                   | 57  | 15 | 0              | 79%  |
| 15. Study parameters                                                     | 1   | 0  | 71             | 1%   |
| 16. Cost                                                                 | 72  | 0  | 0              | 100% |
| 17. Characterising uncertainty                                           | 51  | 21 | 0              | 71%  |
| 18. Characterising heterogeneity                                         | 52  | 20 | 0              | 72%  |
| 19. Study findings, limitations, generalisability, and current knowledge | 68  | 4  | 0              | 94%  |
| 20. Source of funding                                                    | 55  | 17 | 0              | 76%  |
| 21. Conflicts of interest                                                | 45  | 27 | 0              | 63%  |

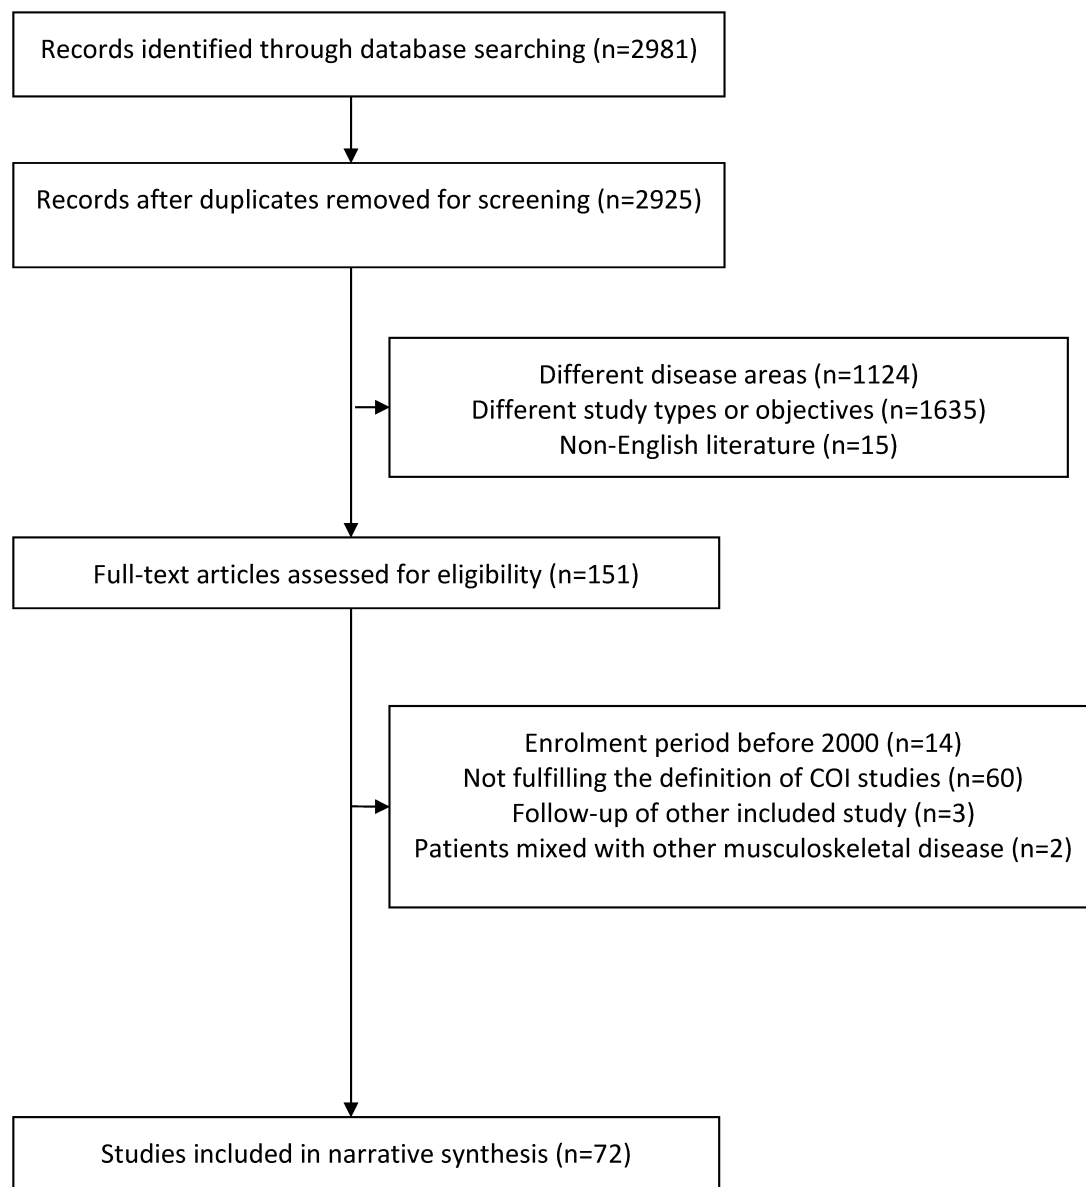

Figure S1. PRISMA flow diagram

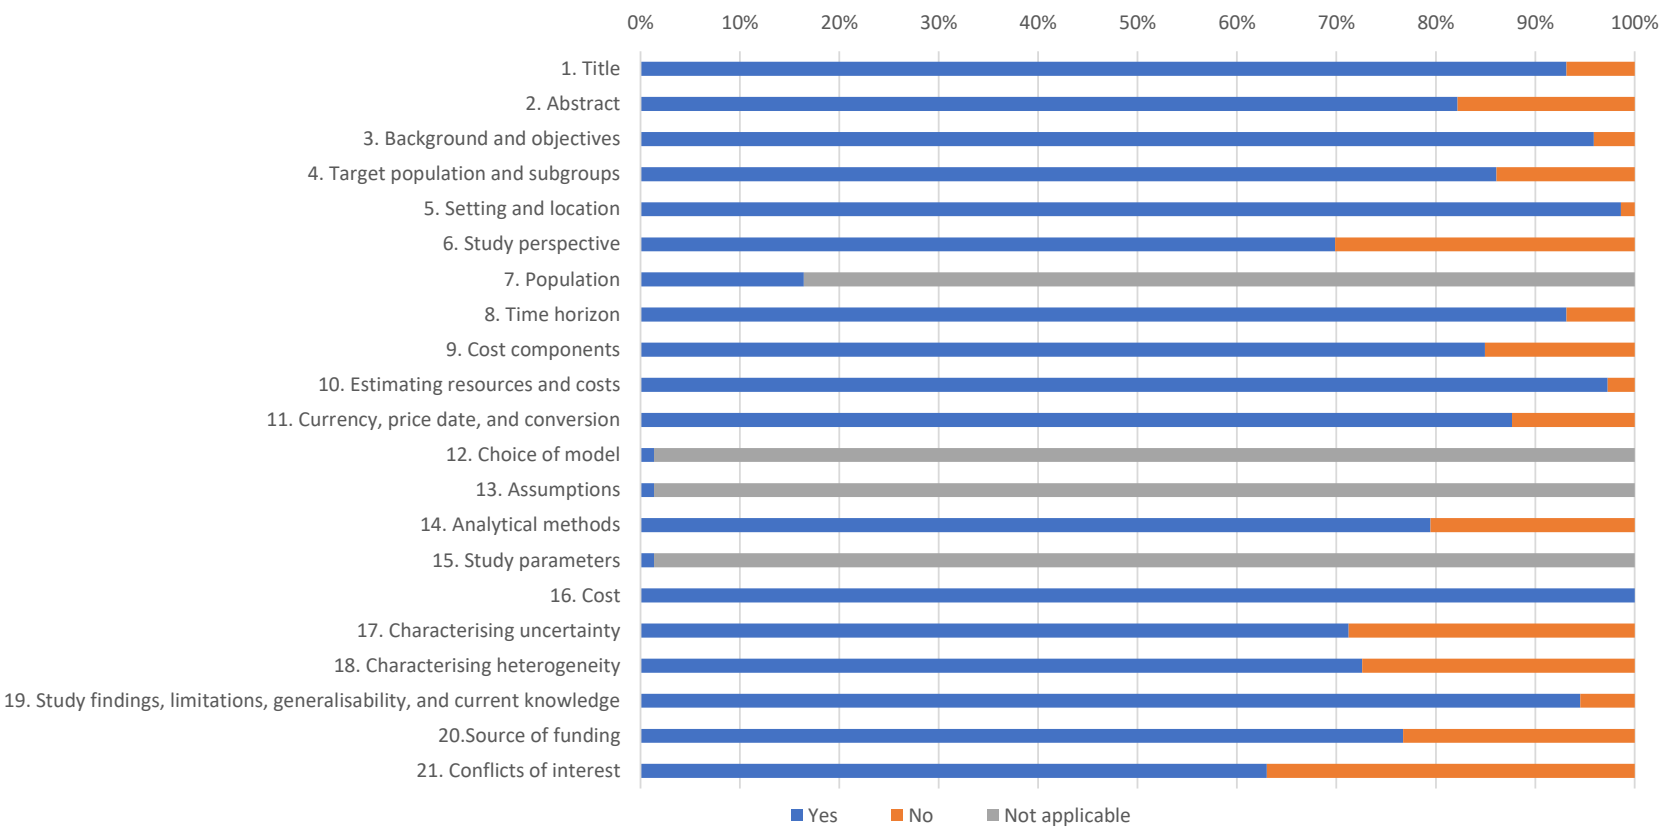

Figure S2. Bar chart illustrating quality assessment of included studies by using modified CHEERS checklist, as percentage of adequately reported items.

**Reference**

1. Radner H, Smolen JS, Aletaha D. Remission in rheumatoid arthritis: Benefit over low disease activity in patient-reported outcomes and costs. *Arthritis Research and Therapy*. 2014;16 (1) (no pagination)(R56).
2. Westhovens R, Boonen A, Verbruggen L, et al. Healthcare consumption and direct costs of rheumatoid arthritis in Belgium. *Clinical Rheumatology*. 2005;24(6):615-619.
3. Klimes J, Vocelka M, Sedova L, et al. Medical and Productivity Costs of Rheumatoid Arthritis in The Czech Republic: Cost-of-Illness Study Based on Disease Severity. *Value in Health Regional Issues*. 2014;4:75-81.
4. Kruntoradova K, Klimes J, Sedova L, Stolfa J, Dolezal T, Petrikova A. Work Productivity and Costs Related to Patients with Ankylosing Spondylitis, Rheumatoid Arthritis, and Psoriasis. *Value in Health Regional Issues*. 2014;4:100-106.
5. Sogaard R, Sorensen J, Linde L, Hetland ML. The significance of presenteeism for the value of lost production: The case of rheumatoid arthritis. *ClinicoEconomics and Outcomes Research*. 2010;2(1):105-112.
6. Kobelt G, Woronoff AS, Richard B, Peeters P, Sany J. Disease status, costs and quality of life of patients with rheumatoid arthritis in France: The ECO-PR Study. *Joint Bone Spine*. 2008;75(4):408-415.
7. Loppenthin K, Esbensen BA, Ostergaard M, Ibsen R, Kjellberg J, Jennum P. Welfare costs in patients with rheumatoid arthritis and their partners compared with matched controls: a register-based study. *Clinical Rheumatology*. 2017;36(3):517-525.
8. Flipon E, Brazier M, Clavel G, et al. Is it possible to identify early predictors of the future cost of chronic arthritis? the VERA project. *Fundamental and Clinical Pharmacology*. 2009;23(1):105-113.
9. Beresniak A, Gossec L, Goupille P, et al. Direct cost-modeling of rheumatoid arthritis according to disease activity categories in France. *Journal of Rheumatology*. 2011;38(3):439-445.
10. Chevreul K, Haour G, Lucier S, et al. Evolution of direct costs in the first years of rheumatoid arthritis: Impact of early versus late biologic initiation - An economic analysis based on the ESPOIR cohort. *PLoS ONE*. 2014;9 (5) (no pagination)(e97077).
11. Beck M, Velten M, Rybarczyk-Vigouret MC, Covassin J, Sordet C, Michel B. Analysis and Breakdown of Overall 1-Year Costs Relative to Inpatient and Outpatient Care Among Rheumatoid Arthritis Patients Treated with Biotherapies Using Health Insurance Claims Database in Alsace. *Drugs - Real World Outcomes*. 2015;2(3):205-215.
12. Fautrel B, Cukierman G, Joubert JM, Laurendeau C, Gourmelen J, Fagnani F. Healthcare service utilisation costs attributable to rheumatoid arthritis in France: Analysis of a representative national claims database. *Joint Bone Spine*. 2016.
13. Martikainen JA, Kautiainen H, Rantalaiho V, Puolakka KT. Longterm work productivity costs due to absenteeism and permanent work disability in patients with early rheumatoid arthritis: A nationwide register study of 7831 patients. *Journal of Rheumatology*. 2016;43(12):2101-2105.
14. Ruof J, Hulsemann JL, Mittendorf T, et al. Costs of rheumatoid arthritis in Germany: A micro-costing approach based on healthcare payer's data sources. *Annals of the Rheumatic Diseases*. 2003;62(6):544-550.
15. Hulsemann JL, Mittendorf T, Merkesdal S, et al. Direct costs related to rheumatoid arthritis: the patient perspective. *Annals of the rheumatic diseases*. 2005;64(10):1456-1461.

16. Merkesdal S, Ruof J, Huelsemann JL, et al. Indirect cost assessment in patients with rheumatoid arthritis (RA): Comparison of data from the health economic patient questionnaire HEQ-RA and insurance claims data. *Arthritis Care and Research*. 2005;53(2):234-240.
17. Kirchhoff T, Ruof J, Mittendorf T, et al. Cost of illness in rheumatoid arthritis in Germany in 1997-98 and 2002: Cost drivers and cost savings. *Rheumatology*. 2011;50(4):756-761.
18. Huscher D, Mittendorf T, Von Hinuber U, et al. Evolution of cost structures in rheumatoid arthritis over the past decade. *Annals of the Rheumatic Diseases*. 2015;74(4):738-745.
19. Ziegelbauer K, Kostev K, Hubinger M, et al. The impact of non-persistence on the direct and indirect costs in patients treated with subcutaneous tumour necrosis factor-alpha inhibitors in Germany. *Rheumatology (United Kingdom)*. 2018;57(7):1276-1281.
20. Horvath Cs Z, Sebestyen A, Osterle A, et al. Economic burden of long-term care of rheumatoid arthritis patients in Hungary. *European Journal of Health Economics*. 2014;15(SUPPL. 1):S131-S135.
21. Della Rossa A, Neri R, Talarico R, et al. Diagnosis and referral of rheumatoid arthritis by primary care physician: Results of a pilot study on the city of Pisa, Italy. *Clinical Rheumatology*. 2010;29(1):71-81.
22. Verstappen SMM, Jacobs JWG, Kruize AA, et al. Trends in economic consequences of rheumatoid arthritis over two subsequent years. *Rheumatology*. 2007;46(6):968-974.
23. Kvamme MK, Lie E, Kvien TK, Kristiansen IS. Two-year direct and indirect costs for patients with inflammatory rheumatic joint diseases: Data from real-life follow-up of patients in the NOR-DMARD registry. *Rheumatology (United Kingdom)*. 2012;51(9):1618-1627.
24. Malinowski KP, Kawalec PP, Mocko P. Indirect costs of absenteeism due to rheumatoid arthritis, psoriasis, multiple sclerosis, insulin-dependent diabetes mellitus, and ulcerative colitis in 2012: A study based on real-life data from the Social Insurance Institution in Poland. *Expert Review of Pharmacoeconomics and Outcomes Research*. 2016;16(2):295-303.
25. Miranda LC, Santos H, Ferreira J, et al. Finding Rheumatoid Arthritis impact on life (FRAIL Study): Economic burden. *Acta Reumatologica Portuguesa*. 2012;37(2):134-142.
26. Leon L, Abasolo L, Fernandez-Gutierrez B, Jover JA, Hernandez-Garcia C. Direct medical costs and its predictors in EMAR-II cohort. *Reumatologia Clinica*. 2016;29.
27. Jacobsson LTH, Lindroth Y, Marsal L, Juran E, Bergstrom U, Kobelt G. Rheumatoid arthritis: What does it cost and what factors are driving those costs? Results of a survey in a community-derived population in Malmo, Sweden. *Scandinavian Journal of Rheumatology*. 2007;36(3):179-183.
28. Hallert E, Husberg M, Kalkan A, Skogh T, Bernfort L. Early rheumatoid arthritis 6 years after diagnosis is still associated with high direct costs and increasing loss of productivity: The Swedish TIRA project. *Scandinavian Journal of Rheumatology*. 2014;43(3):177-183.
29. Eriksson JK, Johansson K, Askling J, Neovius M. Costs for hospital care, drugs and lost work days in incident and prevalent rheumatoid arthritis: How large, and how are they distributed? *Annals of the Rheumatic Diseases*. 2015;74(4):648-654.



30. Johansson K, Eriksson JK, van Vollenhoven R, Miller H, Askling J, Neovius M. Does disease activity at the start of biologic therapy influence health care costs in patients with RA? *Rheumatology (United Kingdom)*. 2015;54(8):1472-1477.
31. Hallert E, Husberg M, Kalkan A, Bernfort L. Rheumatoid arthritis is still expensive in the new decade: a comparison between two early RA cohorts, diagnosed 1996-98 and 2006-09. *Scandinavian Journal of Rheumatology*. 2016;45(5):371-378.
32. Malhan S, Akbulut LA, Bodur H, Tulunay CF. Annual costs of rheumatoid arthritis in Turkey. *Rheumatology International*. 2010;30(5):637-641.
33. Malhan S, Pay S, Ataman S, et al. The cost of care of rheumatoid arthritis and ankylosing spondylitis patients in tertiary care rheumatology units in Turkey. *Clinical and Experimental Rheumatology*. 2012;30(2):202-207.
34. Baser O, Burkan A, Baser E, Koselerli R, Ertugay E, Altinbas A. Direct medical costs associated with rheumatoid arthritis in Turkey: Analysis from National Claims Database. *Rheumatology International*. 2013;33(10):2577-2584.
35. Fautrel B, Clarke AE, Guillemin F, et al. Costs of rheumatoid arthritis: New estimates from the human capital method and comparison to the willingness-to-pay method. *Medical Decision Making*. 2007;27(2):138-150.
36. Barnabe C, Thanh NX, Ohinmaa A, et al. Healthcare service utilisation costs are reduced when rheumatoid arthritis patients achieve sustained remission. *Annals of the Rheumatic Diseases*. 2013;72(10):1664-1668.
37. Tarride JE, Haq M, Nakhai-Pour HR, et al. The excess burden of rheumatoid arthritis in Ontario, Canada. *Clinical and Experimental Rheumatology*. 2013;31(1):18-24.
38. Thanh NX, Ohinmaa A, Barnabe C, et al. Self-reported productivity losses of people with rheumatoid arthritis in Alberta, Canada. *Open Pharmacoeconomics and Health Economics Journal*. 2013;5(1):11-14.
39. Ohinmaa AE, Thanh NX, Barnabe C, et al. Canadian estimates of health care utilization costs for rheumatoid arthritis patients with and without therapy with biologic agents. *Arthritis Care and Research*. 2014;66(9):1319-1327.
40. Yelin E, Murphy L, Cisternas MG, Foreman AJ, Pasta DJ, Helmick CG. Medical care expenditures and earnings losses among persons with arthritis and other rheumatic conditions in 2003, and comparisons with 1997. *Arthritis and Rheumatism*. 2007;56(5):1397-1407.
41. Kessler RC, Maclean JR, Petukhova M, et al. The effects of rheumatoid arthritis on labor force participation, work performance, and healthcare costs in two workplace samples. *Journal of Occupational and Environmental Medicine*. 2008;50(1):88-98.
42. Joyce AT, Smith P, Khandker R, Melin JM, Singh A. Hidden cost of rheumatoid arthritis (RA): Estimating cost of comorbid cardiovascular disease and depression among patients with RA. *Journal of Rheumatology*. 2009;36(4):743-752.
43. Birnbaum H, Pike C, Kaufman R, Marynchenko M, Kidolezi Y, Cifaldi M. Societal cost of rheumatoid arthritis patients in the US. *Current Medical Research and Opinion*. 2010;26(1):77-90.
44. Bonafede MMK, Fox KM, Johnson BH, Watson C, Gandra SR. Factors Associated With the Initiation of Disease-Modifying Antirheumatic Drugs in Newly Diagnosed Rheumatoid Arthritis: A Retrospective Claims Database Study. *Clinical Therapeutics*. 2012;34(2):457-467.
45. Kawatkar AA, Jacobsen SJ, Levy GD, Medhekar SS, Venkatasubramaniam KV, Herrinton LJ. Direct medical expenditure associated with rheumatoid arthritis in a nationally representative sample from the medical expenditure panel survey. *Arthritis Care and Research*. 2012;64(11):1649-1656.

46. Simons WR, Rosenblatt LC, Trivedi DN. The economic consequences of rheumatoid arthritis: Analysis of medical expenditure panel survey 2004, 2005, and 2006 data. *Journal of Occupational and Environmental Medicine*. 2012;54(1):48-55.
47. Kleinman N, Cifaldi M, Smeeding J, Shaw J, Brook R. Annual incremental health benefit costs and absenteeism among employees with and without rheumatoid arthritis. *Journal of Occupational and Environmental Medicine*. 2013;55(3):240-244.
48. Gunnarsson C, Chen J, Rizzo JA, Ladapo JA, Naim A, Lofland JH. The employee absenteeism costs of rheumatoid arthritis: Evidence from US national survey data. *Journal of Occupational and Environmental Medicine*. 2015;57(6):635-642.
49. Zhou ZY, Griffith J, Du EX, Chin D, Betts KA, Ganguli A. Economic Burden of Switching to a Non-Tumor Necrosis Factor Inhibitor Versus a Tumor Necrosis Factor Inhibitor Biologic Therapy among Patients with Rheumatoid Arthritis. *Advances in Therapy*. 2016;33(5):807-823.
50. Curtis JR, Chen L, Greenberg JD, et al. The clinical status and economic savings associated with remission among patients with rheumatoid arthritis: leveraging linked registry and claims data for synergistic insights. *Pharmacoeconomics and Drug Safety*. 2017;26(3):310-319.
51. Grabner M, Boytsov NN, Huang Q, Zhang X, Yan T, Curtis JR. Costs associated with failure to respond to treatment among patients with rheumatoid arthritis initiating TNFi therapy: A retrospective claims analysis. *Arthritis Research and Therapy*. 2017;19 (1) (no pagination)(92).
52. Chen CI, Wang L, Wei W, Yuce H, Phillips K. Burden of rheumatoid arthritis among US Medicare population: Co-morbidities, health-care resource utilization and costs. *Rheumatology Advances in Practice*. 2018;2(1):i1-i9.
53. Strand V, Tundia N, Song Y, Macaulay D, Fuldeore M. Economic burden of patients with inadequate response to targeted immunomodulators for rheumatoid arthritis. *Journal of Managed Care and Specialty Pharmacy*. 2018;24(4):344-352.
54. Aggarwal A, Chandran S, Misra R. Physical, psychosocial and economic impact of rheumatoid arthritis: A pilot study of patients seen at a tertiary care referral centre. *National Medical Journal of India*. 2006;19(4):187-191.
55. Xu C, Mu R, Yang L, et al. Societal costs of rheumatoid arthritis in China: A hospital-based cross-sectional study. *Arthritis Care and Research*. 2014;66(4):523-531.
56. Hu H, Luan L, Yang K, Li SC. Burden of rheumatoid arthritis from a societal perspective: A prevalence-based study on cost of illness for patients with rheumatoid arthritis in China. *International Journal of Rheumatic Diseases*. 2017.
57. Lee VWY, Chan CW, Chan LH, et al. The direct medical cost of rheumatoid arthritis in Hong Kong. *Journal of Medical Economics*. 2007;10(4):443-453.
58. Zhu TY, Tam LS, Li EK. Societal costs of rheumatoid arthritis in Hong Kong: A prevalence-based cost-of-illness study. *Rheumatology*. 2011;50(7):1293-1301.
59. Tanaka E, Inoue E, Mannalithara A, et al. Medical care costs of patients with rheumatoid arthritis during the prebiologics period in Japan: A large prospective observational cohort study. *Modern Rheumatology*. 2010;20(1):46-53.
60. Tanaka E, Hoshi D, Igarashi A, et al. Analysis of direct medical and nonmedical costs for care of rheumatoid arthritis patients using the large cohort database, IORRA. *Modern Rheumatology*. 2013;23(4):742-751.
61. Sruamsiri R, Mahlich J, Tanaka E, Yamanaka H. Productivity loss of Japanese patients with rheumatoid arthritis - A cross-sectional survey. *Modern Rheumatology*. 2017:1-8.

62. Kwon JM, Cho SK, Kim JH, Lee EK. Medical costs for Korean patients with rheumatoid arthritis based on the national claims database. *Rheumatology International*. 2012;32(9):2893-2899.
63. Lang HC, Lee HC, Lee SS, Lin HY, Chiu YM. The impact of introducing biologics to patients with rheumatoid arthritis in Taiwan: a population-based trend study. *International Journal of Rheumatic Diseases*. 2016;19(11):1112-1118.
64. Wang BCM, Hsu PN, Furnback W, et al. Estimating the Economic Burden of Rheumatoid Arthritis in Taiwan Using the National Health Insurance Database. *Drugs - Real World Outcomes*. 2016;3(1):107-114.
65. Shi Q, Li KJ, Treuer T, et al. Estimating the response and economic burden of rheumatoid arthritis patients treated with biologic disease-modifying antirheumatic drugs in Taiwan using the national health insurance research database (NHIRD). *PLoS ONE*. 2018;13 (4) (no pagination)(e0193489).
66. Osiri M, Maetzel A, Tugwell P. The economic burden of rheumatoid arthritis in a developing nation: Results from a one-year prospective cohort study in Thailand. *Journal of Rheumatology*. 2007;34(1):57-63.
67. Osiri M, Sattayasomboon Y. Prevalence and out-patient medical costs of comorbid conditions in patients with rheumatoid arthritis. *Joint Bone Spine*. 2013;80(6):608-612.
68. Chermont GC, Kowalski SC, Ciconelli RM, Ferraz MB. Resource utilization and the cost of rheumatoid arthritis in Brazil. *Clinical and Experimental Rheumatology*. 2008;26(1):24-31.
69. De Azevedo ABC, Ferraz MB, Ciconelli RM. Indirect costs of rheumatoid arthritis in Brazil. *Value in Health*. 2008;11(5):869-877.
70. Alvarez-Hernandez E, Pelaez-Ballesteros I, Boonen A, et al. Catastrophic health expenses and impoverishment of households of patients with rheumatoid arthritis. *Reumatologia Clinica*. 2012;8(4):168-173.
71. Cross MJ, March LM, Lapsley HM, Byrne E, Brooks PM. Patient self-efficacy and health locus of control: Relationships with health status and arthritis-related expenditure. *Rheumatology*. 2006;45(1):92-96.
